# Supplementary material
Source: PubMed Central journal article supplement (PMC1868508)
Supplement: NIHMS20514-supplement-Table1.pdf [file NIHMS20514-supplement-Table1.pdf]

### Supplementary Table 1. Muscle genes on the array sorted into kinetic groups

#### Tadpole specific genes (ns-ns-down)

| Accession number | Gene name                           | 2 wk | 6 wk | frog limb | NF62 tail |
|------------------|-------------------------------------|------|------|-----------|-----------|
| BC043995         | actinin, alpha 1                    | NS   | NS   | 0.49      | 2.85      |
| BC046257         | calponin 2                          | NS   | NS   | 0.39      | 7.81      |
| BC043808         | calponin 3, acidic                  | NS   | NS   | 0.25      | 2.02      |
| X07068           | AchR, gamma                         | NS   | NS   | 0.12      | NS        |
| BC044316         | endothelin receptor type A          | NS   | NS   | 0.54      | 2.53      |
| BC041248         | FK506 binding protein 1A, 12kDa     | NS   | NS   | 0.57      | NS        |
| AJ551272         | mitogen-activated protein kinase 1  | NS   | NS   | 0.31      | NS        |
| BQ728062         | myosin, heavy polypeptide 3         | NS   | NS   | 0.50      | 3.02      |
| CB562518         | nebulin                             | NS   | NS   | 0.53      | NS        |
| CD302425         | plectin 1                           | NS   | NS   | 0.48      | NS        |
| BC045063         | poly(A) binding protein             | NS   | NS   | 0.50      | NS        |
| AF274053         | potassium channel                   | NS   | NS   | 0.34      | NS        |
| CA982496         | ring finger protein 28              | NS   | NS   | 0.42      | NS        |
| U25961           | transcription factor 4              | NS   | NS   | 0.25      | NS        |
| X99701           | utrophin (homologous to dystrophin) | NS   | NS   | 0.40      | NS        |
| BG162206         | YY1 associated factor 2             | NS   | NS   | 0.51      | NS        |

#### Unchanged during development (ns-ns-ns)

|          |                                             |    |    |    |      |
|----------|---------------------------------------------|----|----|----|------|
| CB207449 | actin related protein 2/3 complex subunit 4 | NS | NS | NS | 1.69 |
| BJ633933 | actinin, alpha 2                            | NS | NS | NS | NS   |
| CB565496 | actinin, alpha 4                            | NS | NS | NS | NS   |
| BC044065 | ankyrin repeat domain 2                     | NS | NS | NS | 0.62 |
| CD328323 | ATP-binding cassette                        | NS | NS | NS | NS   |
| CD101506 | calcium channel                             | NS | NS | NS | NS   |
| AF212199 | calpain 2                                   | NS | NS | NS | NS   |
| BU915316 | cardiotrophin 1                             | NS | NS | NS | NS   |
| U49258   | cholecystokinin A receptor                  | NS | NS | NS | NS   |

|          |                                              |    |    |    |      |
|----------|----------------------------------------------|----|----|----|------|
| BQ735962 | collagen, type VIII, alpha 1                 | NS | NS | NS | NS   |
| BC046265 | dystrobrevin, alpha                          | NS | NS | NS | NS   |
| CB563327 | Fast troponin I                              | NS | NS | NS | NS   |
| BG022984 | fer-1-like 3, myoferlin (C. elegans)         | NS | NS | NS | NS   |
| BU904541 | filamin B, beta                              | NS | NS | NS | NS   |
| CD361626 | flightless I homolog (Drosophila)            | NS | NS | NS | NS   |
| CF521918 | glucan (1,4-alpha-), branching enzyme 1      | NS | NS | NS | NS   |
| M29857   | insulin-like growth factor 1 (somatomedin C) | NS | NS | NS | NS   |
| CA972353 | integrin beta 1 binding protein 3            | NS | NS | NS | NS   |
| BJ068711 | integrin, alpha 7                            | NS | NS | NS | NS   |
| BX846527 | kininogen                                    | NS | NS | NS | NS   |
| X13169   | lamin A/C                                    | NS | NS | NS | NS   |
| BJ634323 | myocyte enhancer factor 2A                   | NS | NS | NS | NS   |
| CB197861 | myomesin 1 (skelemin) 185kDa                 | NS | NS | NS | NS   |
| CB563551 | myomesin 2                                   | NS | NS | NS | NS   |
| CA791495 | myosin IA                                    | NS | NS | NS | NS   |
| CB563516 | myosin light chain 2                         | NS | NS | NS | NS   |
| BG885146 | myosin light chain kinase 2                  | NS | NS | NS | NS   |
| BC041716 | myosin, heavy polypeptide 4                  | NS | NS | NS | 0.21 |
| BJ083927 | myosin, heavy polypeptide 7                  | NS | NS | NS | NS   |
| CD256657 | myosin, light polypeptide 6                  | NS | NS | NS | NS   |
| BC054147 | myosin, light polypeptide 7                  | NS | NS | NS | NS   |
| BQ399543 | myotubular myopathy 1                        | NS | NS | NS | NS   |
| CB563823 | myozenin 2                                   | NS | NS | NS | NS   |
| BI851040 | nebulette                                    | NS | NS | NS | NS   |
| AW635944 | pantothenate kinase 4                        | NS | NS | NS | 0.65 |
| BC048220 | plectin 1                                    | NS | NS | NS | NS   |
| AF279245 | potassium voltage-gated channel              | NS | NS | NS | 1.57 |
| AJ009276 | protein phosphatase 1                        | NS | NS | NS | NS   |
| BG555613 | Rho guanine nucleotide exchange factor       | NS | NS | NS | NS   |
| BU901771 | sarcolemma associated protein                | NS | NS | NS | NS   |

|          |                                               |    |    |    |      |
|----------|-----------------------------------------------|----|----|----|------|
| CD363026 | sarcospan                                     | NS | NS | NS | NS   |
| AF279254 | sine oculis homeobox homolog 1                | NS | NS | NS | NS   |
| BQ733036 | smoothelin                                    | NS | NS | NS | NS   |
| BG347872 | solute carrier family 6                       | NS | NS | NS | 0.74 |
| AJ009305 | solute carrier family 25                      | NS | NS | NS | 1.51 |
| BJ629866 | sorcini                                       | NS | NS | NS | 1.40 |
| BC049289 | spectrin repeat containing nuclear envelope 1 | NS | NS | NS | NS   |
| CD255549 | titin-cap (telethonin)                        | NS | NS | NS | NS   |
| BC043980 | tropomyosin 3                                 | NS | NS | NS | NS   |

**Secondary candidate genes (ns-ns-up, ns-down-up)**

|          |                                                     |    |    |        |      |
|----------|-----------------------------------------------------|----|----|--------|------|
| CD328277 | acetylcholinesterase                                | NS | NS | 1.53   | NS   |
| CB561392 | actin, alpha 2, smooth muscle, aorta                | NS | NS | 1.34   | NS   |
| CB564203 | actin, alpha 3, skeletal muscle                     | NS | NS | 1.70   | NS   |
| CB984321 | Actin, alpha cardiac                                | NS | NS | 1.80   | NS   |
| CB198477 | adenylate kinase 1                                  | NS | NS | 3.53   | 0.28 |
| BC044021 | adenylosuccinate lyase                              | NS | NS | 3.75   | 0.18 |
| BC043896 | adenylosuccinate synthase                           | NS | NS | 1.43   | NS   |
| BG811684 | adenylosuccinate synthase like 1                    | NS | NS | 1.37   | 0.5  |
| AJ009306 | aldolase A, fructose-bisphosphate                   | NS | NS | 12.79  | 0.23 |
| BG159998 | alpha fast tropomyosin                              | NS | NS | 5.05   | NS   |
| BX848751 | amylo-1, 6-glucosidase, 4-alpha-glucanotransferase  | NS | NS | 7.56   | 0.37 |
| AF527799 | blood vessel epicardial substance                   | NS | NS | 2.52   | 0.31 |
| AF421880 | calcium channel                                     | NS | NS | 8.72   | 0.28 |
| CA983434 | CD9 antigen (p24)                                   | NS | NS | 1.44   | 2.63 |
| U04618   | cholinergic receptor, nicotinic, beta polypeptide 1 | NS | NS | 1.35   | NS   |
| BC045123 | creatine kinase, mitochondrial 1 (ubiquitous)       | NS | NS | 2.27   | NS   |
| BC046260 | dystroglycan 1                                      | NS | NS | 2.61   | 0.42 |
| BC054240 | enigma (LIM domain protein)                         | NS | NS | 30.78  | 0.45 |
| BC054279 | eukaryotic translation elongation factor            | NS | NS | 338.77 | 4.95 |
| CB201255 | four and a half LIM domains 1                       | NS | NS | 4.09   | NS   |

|          |                                               |    |      |       |      |
|----------|-----------------------------------------------|----|------|-------|------|
| CA791063 | Fukuyama type congenital muscular dystrophy   | NS | NS   | 1.46  | NS   |
| BC045001 | guanidinoacetate N-methyltransferase          | NS | NS   | 3.78  | 0.10 |
| BC045015 | lactate dehydrogenase A                       | NS | NS   | 10.66 | 0.20 |
| CB200260 | LIM protein                                   | NS | NS   | 2.54  | NS   |
| CD328660 | mitogen-activated protein kinase 12           | NS | NS   | 1.50  | NS   |
| S84990   | MRF4                                          | NS | NS   | 1.44  | NS   |
| BJ081157 | myocilin                                      | NS | NS   | 1.60  | NS   |
| X16106   | myogenic factor 3                             | NS | NS   | 2.95  | 0.41 |
| BG347956 | myosin light chain 1v                         | NS | NS   | 5.89  | 0.41 |
| CB943928 | myosin light chain 1, skeletal muscle isoform | NS | NS   | 1.42  | NS   |
| BX852383 | myosin, heavy polypeptide 11, smooth muscle   | NS | NS   | 1.45  | NS   |
| BQ731714 | myosin, heavy polypeptide 2, adult            | NS | NS   | 15.42 | 0.59 |
| CB561643 | myosin VA (heavy polypeptide 12, myosin)      | NS | NS   | 2.38  | NS   |
| CB941908 | obscurin                                      | NS | NS   | 4.48  | NS   |
| BC045100 | phosphofructokinase, muscle                   | NS | 0.61 | 23.59 | 0.16 |
| BC043781 | phosphoglycerate kinase 1                     | NS | NS   | 9.21  | 0.11 |
| BX855349 | potassium voltage-gated channel               | NS | NS   | 1.35  | NS   |
| M94258   | potassium voltage-gated channel               | NS | NS   | 1.30  | 0.73 |
| BC044112 | pyruvate dehydrogenase kinase                 | NS | NS   | 4.22  | NS   |
| BC044007 | pyruvate kinase, muscle                       | NS | NS   | 15.08 | 0.1  |
| CB563362 | ribosomal protein L3-like                     | NS | NS   | 1.57  | 0.75 |
| CB206117 | sarcoglycan, beta                             | NS | NS   | 1.57  | 0.50 |
| X90838   | solute carrier family 8                       | NS | NS   | 1.31  | NS   |
| BG018761 | titin immunoglobulin domain protein           | NS | NS   | 1.32  | NS   |
| CB562862 | troponin I, skeletal, slow                    | NS | NS   | 1.39  | NS   |
| AF467919 | troponin T2, cardiac                          | NS | NS   | 1.29  | 0.74 |
| AY114144 | troponin T3, skeletal, fast                   | NS | NS   | 32.34 | 0.12 |
| BC060013 | UDP-glucose pyrophosphorylase 2               | NS | NS   | 2.76  | 0.33 |

**Genes unaffected by TRDN but TH responsive (ns-up-up and ns-down-down)**

|          |                                   |    |      |      |      |
|----------|-----------------------------------|----|------|------|------|
| BC045043 | actin related protein 2/3 complex | NS | 2.30 | 1.87 | 3.29 |
|----------|-----------------------------------|----|------|------|------|

|          |                                          |    |      |       |      |
|----------|------------------------------------------|----|------|-------|------|
| CB560852 | smooth muscle actin                      | NS | 2.66 | 4.47  | 2.45 |
| BC045218 | aldolase C, fructose-bisphosphate        | NS | 2.01 | 2.36  | NS   |
| AB061521 | calpain 1, (mu/I) large subunit          | NS | 0.43 | 0.52  | NS   |
| BC060387 | calponin 1, basic, smooth muscle         | NS | 4.14 | 3.47  | NS   |
| X16842   | desmin                                   | NS | 2.05 | 2.23  | 0.22 |
| X99700   | dystrophin                               | NS | 1.91 | 2.16  | NS   |
| BC054169 | enolase 1, (alpha)                       | NS | 1.71 | 2.77  | 0.3  |
| BC042343 | connexin 45                              | NS | 0.69 | 0.29  | 2.11 |
| BC043951 | kelch repeat and BTBdomain containing 10 | NS | 3.00 | 2.60  | 0.34 |
| BU910446 | msh homeo box homolog 1 (Drosophila)     | NS | 0.19 | 0.09  | NS   |
| BJ083441 | myf-5                                    | NS | 7.11 | 17.55 | NS   |
| AF532600 | myocardin-related transcription factor B | NS | 0.73 | 0.51  | 4.69 |
| AJ009303 | myogenic factor 5                        | NS | 0.50 | 0.35  | NS   |
| BC054315 | myosin binding protein H                 | NS | 1.62 | 4.30  | 0.12 |
| BC042231 | myosin, light polypeptide 9              | NS | 2.54 | 2.83  | 2.23 |
| AF257236 | poly(A) binding protein, nuclear 1       | NS | 0.70 | 0.51  | NS   |
| U89265   | potassium voltage-gated channel          | NS | 0.27 | 0.20  | NS   |
| CD254362 | prostaglandin D2 synthase 21kDa          | NS | 1.85 | 2.07  | NS   |
| AF037073 | Rho-associated protein kinase 2          | NS | 1.50 | 1.44  | NS   |
| CB201454 | ring finger protein 30                   | NS | 2.53 | 2.59  | 2.24 |
| BX847353 | S100 calcium binding protein A14         | NS | 1.50 | 1.85  | 2.86 |
| AF343894 | small muscle protein, X-linked           | NS | 1.87 | 6.23  | 0.35 |
| BX855266 | solute carrier family 25                 | NS | 1.54 | 16.97 | 0.32 |
| BC044694 | tafazzin                                 | NS | 0.58 | 0.23  | 2.19 |
| BC043885 | titin                                    | NS | 1.70 | 2.17  | NS   |
| BC046722 | transgelin 2                             | NS | 1.75 | 1.42  | 1.81 |

**Primary candidate genes (down-down-up and down-ns-up)**

|          |                                 |      |      |       |      |
|----------|---------------------------------|------|------|-------|------|
| BC046739 | actin, alpha 1, skeletal muscle | 0.25 | 0.24 | 22.44 | 0.11 |
| BC046852 | amphiphysin II                  | 0.49 | NS   | 1.91  | 0.44 |

|          |                                          |      |      |        |      |
|----------|------------------------------------------|------|------|--------|------|
| BC044063 | Ca <sup>++</sup> transporting ATPase     | 0.29 | 0.57 | 7.07   | NS   |
| BC046947 | calsequestrin 1                          | 0.17 | 0.39 | 69.63  | 0.27 |
| BC045081 | cholinergic receptor, nicotinic, alpha   | 0.52 | 0.68 | 1.54   | 0.48 |
| BC043628 | cholinergic receptor, nicotinic, delta   | 0.58 | NS   | 2.36   | 0.21 |
| U19612   | cholinergic receptor, nicotinic, epsilon | 0.53 | NS   | 4.63   | 0.31 |
| CB945142 | creatine kinase B                        | 0.52 | NS   | 24.70  | 0.33 |
| BC042249 | creatine kinase M, muscle                | 0.29 | NS   | 8.61   | NS   |
| BX847508 | cytochrome c oxidase assembly protein    | 0.39 | NS   | 10.53  | 0.23 |
| BC045082 | enolase 3, (beta, muscle)                | 0.27 | 0.31 | 125.57 | 0.07 |
| BC042340 | LIM domain binding 3 (ZASP)              | 0.48 | NS   | 12.48  | 0.33 |
| BC041221 | LIM domain protein                       | 0.59 | NS   | 14.71  | 0.1  |
| CD255184 | myosin heavy chain, E3                   | 0.17 | 0.64 | 5.11   | 0.37 |
| BC054224 | myozenin 1                               | 0.34 | NS   | 74.83  | 0.23 |
| BC043842 | phosphoglycerate mutase 2 (muscle)       | 0.13 | 0.28 | 56.91  | 0.03 |
| BC043830 | phosphorylase kinase, gamma 1 (muscle)   | 0.35 | 0.40 | 16.45  | 0.36 |
| BX851926 | ryanodine receptor 3                     | 0.43 | NS   | 4.85   | 0.37 |
| BJ029671 | sirtuin                                  | 0.57 | 0.62 | 25.62  | 0.22 |
| CB984281 | solute carrier family 25                 | 0.68 | NS   | 5.90   | 0.24 |
| M87307   | tropomyosin 2 (beta)                     | 0.43 | NS   | 14.20  | 0.36 |
| AB003080 | troponin C, slow                         | 0.17 | 0.09 | 3.28   | NS   |
| BX850052 | troponin fast                            | 0.35 | NS   | 8.48   | NS   |

**Genes that follows TH concentration (ns-up-ns and ns-down-ns)**

|          |                                     |    |      |      |      |
|----------|-------------------------------------|----|------|------|------|
| CD327588 | cartilage associated protein        | NS | 1.67 | NS   | NS   |
| CD302358 | collagen, type VI, alpha 3          | NS | 2.03 | NS   | NS   |
| CA971861 | cysteine and glycine-rich protein 2 | NS | 1.67 | NS   | 1.83 |
| BJ068403 | muscle RAS oncogene homolog         | NS | 1.36 | 0.53 | 2.19 |
| AY046532 | myogenin                            | NS | 2.11 | 0.09 | NS   |
| AF364821 | myosin light chain 1av (MLC1av)     | NS | 0.72 | NS   | NS   |
| U71076   | potassium voltage-gated channel     | NS | 1.57 | 0.26 | NS   |

The numbers are ratio of the log intensity of three experimental hybridization values (2 wk and 6 wk transgenic limbs and control frog limbs) relative to the control NF55 tadpole limb or NF62 tail compared to NF54 tail.  
NS, not significant.
