# Supplementary material
Source: PubMed Central journal article supplement (PMC1868508)
Supplement: NIHMS20514-supplement-Table2.pdf [file NIHMS20514-supplement-Table2.pdf]

## Supplementary Table 2. All secondary candidate genes

### The profile ns-down-up

| Accession number | Gene name                                                 | 6 wk | Frog  | Tail NF62 |
|------------------|-----------------------------------------------------------|------|-------|-----------|
| BC046371         | propionyl Coenzyme A carboxylase, beta polypeptide        | 0.70 | 1.87  | 0.52      |
| U08408           | arginase, type II                                         | 0.62 | 1.70  | 0.59      |
| BC045005         | holocytochrome c synthase (cytochrome c heme-lyase)       | 0.68 | 2.45  | 0.43      |
| BC057214         | mitochondrial ribosomal protein L55                       | 0.69 | 1.97  | NS        |
| BX846125         | RP42 homolog                                              | 0.43 | 1.91  | NS        |
| BU910126         | SVAP1 protein                                             | 0.65 | 1.58  | NS        |
| CD101250         | oncomodulin                                               | 0.37 | 4.00  | 0.15      |
| CD301095         | esterase D/formylglutathione hydrolase                    | 0.64 | 1.34  | 0.37      |
| CB941244         | Unk. EST                                                  | 0.60 | 3.19  | 1.69      |
| AB072007         | transmembrane protein 52                                  | 0.68 | 1.81  | NS        |
| BU916064         | benzodiazapine receptor (peripheral) associated protein 1 | 0.64 | 2.56  | 0.61      |
| BX853095         | chromosome 9 open reading frame 61                        | 0.64 | 3.87  | 0.22      |
| BC042287         | carbonic anhydrase II                                     | 0.59 | 4.63  | 3.44      |
| CD253778         | HNF1 alpha                                                | 0.50 | 3.45  | 0.25      |
| BC045100         | phosphofructokinase, muscle                               | 0.61 | 23.59 | 0.16      |
| CD253447         | nipsnap homolog 3A (C. elegans)                           | 0.65 | 1.81  | NS        |
| BC041492         | hypothetical protein FLJ10006                             | 0.69 | 2.10  | NS        |
| AW766955         | Unk. EST                                                  | 0.57 | 1.63  | NS        |

### The profile ns-ns-up

|          |                                                    |        |      |  |
|----------|----------------------------------------------------|--------|------|--|
| BC054279 | eukaryotic translation elongation factor 1 alpha 2 | 338.77 | 4.95 |  |
| BG162895 | NADH dehydrogenase (ubiquinone) Fe-S protein 4     | 70.84  | 4.35 |  |
| BC059335 | proteasome (prosome, macropain) subunit, beta type | 34.17  | NS   |  |
| AY114144 | troponin T3, skeletal, fast                        | 32.34  | 0.12 |  |
| CD302014 | XFG 5-1 and XFG 5-2 genes for zinc finger proteins | 31.83  | 0.31 |  |

|          |                                                                       |       |      |
|----------|-----------------------------------------------------------------------|-------|------|
| BC054240 | enigma (LIM domain protein)                                           | 30.78 | 0.45 |
| BC044330 | solute carrier family 16 (monocarboxylic acid transporters), member 3 | 24.61 | 0.27 |
| BJ637800 | Unk. EST                                                              | 23.15 | NS   |
| BG264196 | hemoglobin, alpha 2                                                   | 22.17 | 4.04 |
| BX846343 | Septin4                                                               | 21.59 | 0.26 |
| BC046673 | aldolase A, fructose-bisphosphate                                     | 16.21 | 0.19 |
| BX846707 | TPA-induced transmembrane protein                                     | 16.07 | 0.28 |
| BC043836 | skinny hedgehog like                                                  | 16.02 | 0.07 |
| BQ731714 | myosin, heavy polypeptide 2, skeletal muscle, adult                   | 15.42 | 0.59 |
| BC044007 | pyruvate kinase, muscle                                               | 15.08 | 0.1  |
| BC060011 | glucokinase (hexokinase 4) regulatory protein                         | 14.82 | 0.21 |
| BX848512 | cytochrome c oxidase subunit VIIa polypeptide 2 like                  | 14.40 | 0.38 |
| BU899397 | tetraspan 1                                                           | 13.51 | NS   |
| AJ009306 | aldolase A, fructose-bisphosphate                                     | 12.79 | 0.23 |
| BC060028 | sodium channel, voltage-gated, type IV, beta                          | 12.71 | 0.17 |
| BF612261 | microtubule/chromatin interaction                                     | 12.42 | NS   |
| BC043876 | phosphoglucomutase 1                                                  | 12.31 | 0.05 |
| BG163021 | Unk. EST                                                              | 11.74 | 1.71 |
| CA983427 | hypothetical protein LOC134145                                        | 11.59 | 0.29 |
| BC045015 | lactate dehydrogenase A                                               | 10.66 | 0.2  |
| BC045269 | glutamic-oxaloacetic transaminase 1                                   | 10.44 | 0.15 |
| CD327121 | RAS guanyl releasing protein 1                                        | 9.77  | NS   |
| BG264233 | Clathrin coat assembly protein                                        | 9.25  | NS   |
| BC043781 | phosphoglycerate kinase 1                                             | 9.21  | 0.11 |
| AF421880 | calcium channel, voltage-dependent, L type, alpha 1S subunit          | 8.72  | 0.28 |
| BC045243 | serologically defined colon cancer antigen 1                          | 8.69  | NS   |
| BG264811 | Unk. EST                                                              | 8.66  | NS   |
| BC041738 | amyloid P component, serum                                            | 8.34  | NS   |
| AW767623 | ubiquinol-cytochrome c reductase (6.4kD) subunit                      | 8.05  | 0.51 |
| CB209556 | Unk. EST                                                              | 8.03  | 0.12 |
| CF283499 | leukocyte cell derived chemotaxin 1                                   | 7.94  | 0.27 |

|          |                                                                       |      |      |
|----------|-----------------------------------------------------------------------|------|------|
| BU916269 | Unk. EST                                                              | 7.90 | 0.58 |
| BX848751 | amylase-1, 6-glucosidase, 4-alpha-glucanotransferase                  | 7.56 | 0.37 |
| CA980988 | peroxiredoxin 3                                                       | 7.23 | NS   |
| BM190826 | SH3 multiple domains 2                                                | 7.10 | 0.16 |
| BX854153 | PTD008 protein                                                        | 6.91 | 1.45 |
| BF614639 | ATPase inhibitory factor 1                                            | 6.91 | NS   |
| BE490891 | Unk. EST                                                              | 6.64 | NS   |
| CF519937 | Unk. EST                                                              | 6.35 | NS   |
| BC060486 | solute carrier family 37 (glycerol-6-phosphate transporter), member 4 | 6.33 | 0.41 |
| BC059972 | pyruvate dehydrogenase kinase, isoenzyme 2                            | 5.95 | 0.42 |
| AY362041 | superoxide dismutase 2, mitochondrial                                 | 5.91 | 0.51 |
| BG347956 | Xenopus laevis myosin light chain 1v                                  | 5.89 | 0.41 |
| CB592100 | NADH dehydrogenase (ubiquinone) 1, alpha/beta subcomplex, 1, 8kDa     | 5.87 | 0.27 |
| BF047364 | ATP synthase, mitochondrial F0 complex, subunit f, isoform 2          | 5.85 | 0.50 |
| CB199961 | ATP synthase, mitochondrial F0 complex, subunit e                     | 5.82 | NS   |
| BG486716 | ring finger protein (C3HC4 type)                                      | 5.75 | NS   |
| M16259   | ATP synthase, mitochondrial F1 complex, alpha subunit, isoform 1      | 5.73 | 0.22 |
| BU908919 | dentin sialophosphoprotein preproprotein                              | 5.73 | 0.56 |
| BF611222 | cytochrome c oxidase subunit VIIa polypeptide 2 like                  | 5.65 | 0.33 |
| CB198532 | ubiquinol-cytochrome c reductase binding protein                      | 5.62 | 0.35 |
| BC041213 | carbonic anhydrase II                                                 | 5.49 | 1.82 |
| U03878   | pyruvate kinase, muscle                                               | 5.46 | 0.17 |
| CD099091 | Unk. EST                                                              | 5.45 | NS   |
| CD360625 | PCTAIRE protein kinase 1                                              | 5.45 | 0.70 |
| BF231948 | Low log int. Unk. EST                                                 | 5.35 | NS   |
| U39669   | pyruvate dehydrogenase (lipoamide) beta                               | 5.35 | 0.38 |
| BU904087 | cytochrome c oxidase subunit IV isoform 2                             | 5.34 | NS   |
| AW634424 | ATP synthase, H+ transporting, mitochondrial F0 complex, subunit F6   | 5.31 | 0.56 |
| BG161583 | Unk. EST                                                              | 5.31 | 0.20 |
| BC042271 | hypothetical protein MGC15416                                         | 5.27 | 0.29 |
| BG017618 | mitochondrial inner membrane                                          | 5.26 | 0.35 |

|          |                                                                        |      |      |
|----------|------------------------------------------------------------------------|------|------|
| BC042931 | ubiquinol-cytochrome c reductase core protein II                       | 5.09 | 0.32 |
| BG159998 | alpha fast tropomyosin                                                 | 5.05 | NS   |
| CD325457 | complexin 4                                                            | 5.00 | 0.61 |
| CA985882 | ataxin 2 related protein                                               | 4.97 | 0.38 |
| BC044313 | solute carrier family 25 (mitochondrial carrier: glutamate), member 22 | 4.91 | NS   |
| CA972639 | genethonin 1 muscle                                                    | 4.90 | NS   |
| BC049394 | NADH dehydrogenase (ubiquinone) Fe-S protein 1                         | 4.90 | 0.39 |
| BQ728067 | sex comb on midleg-like 2                                              | 4.87 | NS   |
| BX850233 | Unk. EST                                                               | 4.86 | 3.39 |
| BE025729 | acetyl-Coenzyme A acetyltransferase 1                                  | 4.82 | 0.14 |
| BC054959 | ATP synthase, mitochondrial F1 complex, alpha subunit, isoform 1       | 4.82 | 0.24 |
| BG233847 | molecule interacting with Rab13                                        | 4.80 | NS   |
| CB560135 | Unk. EST                                                               | 4.79 | NS   |
| BC047980 | hypothetical protein MGC15416                                          | 4.78 | 0.22 |
| CB563732 | senescence downregulated leo1-like                                     | 4.76 | 0.37 |
| AW200073 | ATP synthase, mitochondrial F1 complex, delta subunit                  | 4.76 | 0.39 |
| AB030904 | thimet oligopeptidase 1                                                | 4.75 | NS   |
| BC049288 | ubiquinol-cytochrome c reductase core protein I                        | 4.75 | 0.35 |
| CB592159 | eukaryotic translation initiation factor 4E-like 3                     | 4.74 | NS   |
| BX855415 | Unk. EST                                                               | 4.71 | NS   |
| BC046577 | voltage-dependent anion channel 1                                      | 4.70 | 0.17 |
| CD302686 | carbonic anhydrase                                                     | 4.70 | 0.63 |
| BC060436 | nipsnap homolog 3A ( <i>C. elegans</i> )                               | 4.69 | 0.32 |
| AW200445 | NADH dehydrogenase 1, subcomplex unknown, 2, 14.5kDa                   | 4.64 | 0.47 |
| BU906294 | acetyl-Coenzyme A acetyltransferase 1                                  | 4.63 | 0.20 |
| BE506967 | NADH dehydrogenase 1 alpha subcomplex, 6, 14kDa                        | 4.62 | 0.40 |
| CA974094 | cytochrome c, somatic                                                  | 4.60 | NS   |
| BQ734654 | transcription factor NSCL-1                                            | 4.58 | 1.62 |
| AW634109 | low molecular mass ubiquinone-binding protein (9.5kD)                  | 4.55 | 0.21 |
| AW199851 | ATP synthase, mitochondrial F0 complex, subunit F6                     | 4.54 | NS   |
| BC046379 | isocitrate dehydrogenase 2 (NADP+), mitochondrial                      | 4.49 | 0.32 |

|          |                                                                |      |      |
|----------|----------------------------------------------------------------|------|------|
| CB941908 | obscurin, cytoskeletal calmodulin and titin-interacting RhoGEF | 4.48 | NS   |
| CA987906 | Unk. EST                                                       | 4.46 | 1.41 |
| CA986227 | lin-9 homolog                                                  | 4.44 | NS   |
| CB207420 | phosphoglycerate kinase 1                                      | 4.42 | 0.29 |
| BJ613977 | Alstrom syndrome 1                                             | 4.40 | NS   |
| BG233756 | beta-1-adrenergic receptor                                     | 4.40 | NS   |
| AW200171 | ATP synthase, mitochondrial F0 complex, subunit g              | 4.37 | NS   |
| BM180516 | Unk. EST                                                       | 4.36 | 1.83 |
| BG019694 | alpha(E)-catenin core and promoter element binding protein     | 4.31 | 1.57 |
| BC044122 | IMP (inosine monophosphate) dehydrogenase 2                    | 4.27 | 0.24 |
| BJ092399 | FK506 binding protein 9                                        | 4.27 | NS   |
| M58019   | major histocompatibility complex, class I-related              | 4.26 | NS   |
| BJ642521 | Unk. EST                                                       | 4.23 | 1.97 |
| BC044112 | pyruvate dehydrogenase kinase, isoenzyme 2                     | 4.22 | NS   |
| BQ731027 | NADH dehydrogenase (ubiquinone) 1 beta subcomplex, 5, 16kDa    | 4.19 | 0.34 |
| BC056098 | NADH dehydrogenase (ubiquinone) Fe-S protein 5, 15kDa          | 4.16 | NS   |
| BI313290 | eukaryotic translation elongation factor 1 alpha 2             | 4.14 | NS   |
| BM191554 | hypothetical protein BC011916                                  | 4.13 | 0.65 |
| BC054183 | NADH dehydrogenase (ubiquinone) 1 alpha subcomplex, 9, 39kDa   | 4.11 | 0.49 |
| CB201255 | four and a half LIM domains 1                                  | 4.09 | NS   |
| BE575890 | Proto-oncogene serine/threonine-protein kinase pim-1           | 4.05 | NS   |
| CD303590 | delta-notch-like EGF repeat-containing transmembrane           | 4.01 | NS   |
| CB196956 | Unk. EST                                                       | 3.99 | NS   |
| BX848879 | NADH dehydrogenase (ubiquinone) 1 alpha subcomplex 7           | 3.96 | NS   |
| CD255428 | hypothetical protein FLJ31842                                  | 3.95 | NS   |
| AW767983 | testis development protein NYD-SP29                            | 3.95 | 2.71 |
| BU900090 | transcription termination factor, RNA polymerase II            | 3.92 | 0.16 |
| CF286827 | Unk. EST                                                       | 3.90 | NS   |
| AF072455 | matrix metalloproteinase 9                                     | 3.89 | NS   |
| BJ056778 | Unk. EST                                                       | 3.89 | NS   |
| AF430140 | dihydrolipoamide S-acetyltransferase                           | 3.88 | 0.28 |

|          |                                                             |      |      |
|----------|-------------------------------------------------------------|------|------|
| AW200087 | zinc finger protein 183 (RING finger, C3HC4 type)           | 3.87 | 0.62 |
| AB037700 | zona pellucida glycoprotein 4                               | 3.86 | NS   |
| BJ635842 | ribosomal protein L36a                                      | 3.86 | 0.34 |
| BC044274 | estrogen-related receptor alpha                             | 3.86 | NS   |
| BI444049 | zinc finger protein 225                                     | 3.83 | 2.33 |
| CD254416 | protein kinase, AMP-activated, beta 1 non-catalytic subunit | 3.83 | 0.41 |
| AF087650 | mesoderm posterior 1                                        | 3.83 | 0.55 |
| BG019985 | Unk. EST                                                    | 3.80 | NS   |
| BU913405 | proline-rich nuclear receptor coactivator 2                 | 3.80 | 2.61 |
| BC045001 | guanidinoacetate N-methyltransferase                        | 3.78 | 0.09 |
| BC048770 | glyceraldehyde-3-phosphate dehydrogenase                    | 3.78 | NS   |
| CD326222 | Unk. EST                                                    | 3.76 | NS   |
| BC044021 | adenylosuccinate lyase                                      | 3.75 | 0.18 |
| BE189549 | Unk. EST                                                    | 3.74 | NS   |
| BX848741 | AD-003 protein                                              | 3.74 | 0.28 |
| BG021145 | Unk. EST                                                    | 3.73 | NS   |
| CA987423 | Unk. EST                                                    | 3.73 | NS   |
| AW147428 | NADH dehydrogenase (ubiquinone) Fe-S protein 6, 13kDa       | 3.73 | 0.40 |
| CD327911 | Unk. EST                                                    | 3.72 | 2.53 |
| U19618   | fibrinogen, B beta polypeptide                              | 3.71 | NS   |
| BI315522 | Unk. EST                                                    | 3.71 | NS   |
| BC058770 | RNA binding motif protein 5                                 | 3.69 | NS   |
| BC046571 | citrate synthase                                            | 3.66 | 0.55 |
| BC053793 | aldo-keto reductase family 1, member C3                     | 3.66 | 4.18 |
| U68724   | myeloperoxidase                                             | 3.64 | NS   |
| BG884818 | epoxide hydrolase 2, cytoplasmic                            | 3.64 | NS   |
| BU909526 | membrane component, chromosome 17, surface marker 2         | 3.62 | NS   |
| BC045127 | cytochrome c-1                                              | 3.58 | 0.28 |
| BF072220 | Unk. EST                                                    | 3.57 | NS   |
| BG407150 | Unk. EST                                                    | 3.57 | NS   |
| CB205976 | Unk. EST                                                    | 3.56 | NS   |

|          |                                                              |      |      |
|----------|--------------------------------------------------------------|------|------|
| BQ734743 | arginine-rich, mutated in early stage tumors                 | 3.56 | NS   |
| BG019287 | ubiquinol-cytochrome c reductase hinge protein               | 3.53 | 0.51 |
| CB198477 | adenylate kinase 1                                           | 3.53 | 0.28 |
| CD255923 | Unk. EST                                                     | 3.52 | NS   |
| BU914114 | likely ortholog of mouse Sds3                                | 3.51 | NS   |
| AF062387 | transporter 2, ATP-binding cassette, sub-family B (MDR/TAP)  | 3.51 | 0.57 |
| CA974238 | ATP synthase, mitochondrial F0 complex, subunit c isoform 3  | 3.50 | 0.41 |
| BM179029 | Unk. EST                                                     | 3.49 | NS   |
| U25285   | sodium channel, nonvoltage-gated 1, beta (Liddle syndrome)   | 3.49 | NS   |
| BQ109740 | Unk. EST                                                     | 3.48 | NS   |
| BC060417 | ATPase, H+ transporting, lysosomal V0 subunit a isoform 4    | 3.47 | 0.51 |
| BX844184 | hypothetical protein LOC114971                               | 3.47 | 0.33 |
| AB048259 | sestrin 1                                                    | 3.44 | NS   |
| BC054322 | complement component 3                                       | 3.44 | NS   |
| BU915007 | Unk. EST                                                     | 3.43 | NS   |
| BI446653 | Unk. EST                                                     | 3.43 | NS   |
| AW199639 | Unk. EST                                                     | 3.41 | 0.37 |
| L20730   | major histocompatibility complex, class I-related            | 3.41 | NS   |
| BE680023 | Unk. EST                                                     | 3.40 | 0.44 |
| BC043859 | succinate dehydrogenase complex, subunit B, iron sulfur (Ip) | 3.40 | 0.55 |
| CB208454 | Unk. EST                                                     | 3.39 | NS   |
| CA987607 | Unk. EST                                                     | 3.38 | 0.19 |
| CA982161 | granulin                                                     | 3.37 | NS   |
| BX849222 | Unk. EST                                                     | 3.34 | 0.26 |
| CA982303 | hypothetical protein LOC114971                               | 3.34 | 0.41 |
| BF048570 | Unk. EST                                                     | 3.34 | 2.23 |
| BJ045539 | hypothetical protein FLJ10884                                | 3.34 | 1.73 |
| BG023549 | myosin IXA                                                   | 3.33 | 3.78 |
| BG360019 | hypothetical protein MGC34290                                | 3.33 | NS   |
| CA790822 | Unk. EST                                                     | 3.32 | NS   |
| BQ387496 | Unk. EST                                                     | 3.27 | NS   |

|          |                                                                  |      |      |
|----------|------------------------------------------------------------------|------|------|
| BU899537 | Unk. EST                                                         | 3.25 | 0.69 |
| CB755961 | Unk. EST                                                         | 3.25 | NS   |
| BQ385192 | Unk. EST                                                         | 3.23 | NS   |
| AY277253 | SH3 protein interacting with Nck, 90 kDa                         | 3.19 | 0.33 |
| BU915756 | apolipoprotein L, 3                                              | 3.19 | NS   |
| BG021169 | Unk. EST                                                         | 3.19 | NS   |
| BU901481 | inosine triphosphatase (nucleoside triphosphate pyrophosphatase) | 3.19 | NS   |
| BG731777 | Unk. EST                                                         | 3.18 | 0.60 |
| BX848343 | NADH dehydrogenase (ubiquinone) 1 beta subcomplex, 4, 15kDa      | 3.18 | 0.47 |
| CD363295 | Unk. EST                                                         | 3.17 | 0.58 |
| BJ068590 | Unk. EST                                                         | 3.16 | NS   |
| AW199788 | Unk. EST                                                         | 3.16 | NS   |
| BC054185 | fibrinogen, gamma polypeptide                                    | 3.15 | 0.70 |
| BU907566 | hypothetical protein MGC8721                                     | 3.14 | NS   |
| BC045222 | hydroxyacyl-Coenzyme A dehydrogenase                             | 3.14 | 0.40 |
| BG439738 | Unk. EST                                                         | 3.13 | NS   |
| BQ733484 | trinucleotide repeat containing 6                                | 3.13 | 1.42 |
| BG161528 | Unk. EST                                                         | 3.13 | NS   |
| BC047261 | succinate dehydrogenase complex, subunit A, flavoprotein (Fp)    | 3.12 | 0.36 |
| BC041195 | tubulin, alpha 3                                                 | 3.10 | NS   |
| BI478075 | Unk. EST                                                         | 3.09 | 2.88 |
| CF521207 | Unk. EST                                                         | 3.08 | 2.36 |
| AW200323 | hypothetical protein HSPC132                                     | 3.08 | 0.54 |
| CF287016 | NADH dehydrogenase (ubiquinone) Fe-S protein 1                   | 3.07 | 0.46 |
| BC046580 | small inducible cytokine subfamily E, member 1                   | 3.07 | 0.25 |
| BJ616370 | Unk. EST                                                         | 3.07 | NS   |
| BI315361 | Unk. EST                                                         | 3.06 | NS   |
| CA971655 | small nuclear ribonucleoprotein D3 polypeptide 18kDa             | 3.05 | NS   |
| BC060456 | transforming growth factor beta regulator 4                      | 3.03 | 0.41 |
| CD252735 | synuclein, beta                                                  | 3.02 | 0.75 |
| AY069942 | myeloperoxidase                                                  | 3.02 | 1.48 |



|          |                                       |      |      |
|----------|---------------------------------------|------|------|
| AW198984 | Unk. EST                              | 3.02 | 1.39 |
| BC043807 | BCL2-associated athanogene 3          | 3.02 | NS   |
| BG345920 | Unk. EST                              | 3.01 | NS   |
| CA789403 | acetyl-Coenzyme A acetyltransferase 1 | 3.01 | 0.20 |
| BG019821 | Unk. EST                              | 3.00 | 1.95 |

The numbers are ratio of the log intensity of three experimental hybridization values (6 wk transgenic limbs and control frog limbs) relative to the control NF55 tadpole limb or NF62 tail compared to NF54 tail.

NS or no entry mean the expression ratio is not significant. Note that none of these have an entry for 2 wk.
