# Supplementary material
Source: PubMed Central journal article supplement (PMC1868508)
Supplement: NIHMS20514-supplement-Table3.pdf [file NIHMS20514-supplement-Table3.pdf]

### Supplementary Table 3. All glycolysis genes

#### Expression changed

| Accession number | Gene Name                               | 2 wk | 6 wk | Frog  | Tail NF62 |
|------------------|-----------------------------------------|------|------|-------|-----------|
| BC046673         | aldolase A, fructose-bisphosphate       | NS   | NS   | 16.21 | 0.19      |
| AF430140         | dihydrolipoamide S-acetyltransferase    | NS   | NS   | 3.9   | 0.28      |
| BC045082         | enolase 3, (beta, muscle)               | 0.27 | 0.31 | 125.6 | 0.07      |
| AF288471         | hexokinase 1                            | NS   | NS   | 2.45  | 0.68      |
| BC060011         | Hexokinase 4 regulator                  | NS   | NS   | 14.82 | 0.20      |
| BC045015         | lactate dehydrogenase A                 | NS   | NS   | 10.66 | 0.20      |
| BC054257         | lactate dehydrogenase B                 | NS   | NS   | 2.65  | 0.24      |
| U39669           | pyruvate dehydrogenase (lipoamide) beta | NS   | NS   | 5.35  | 0.38      |
| BC045100         | phosphofructokinase, muscle             | NS   | 0.61 | 23.6  | 0.16      |
| BC043842         | phosphoglycerate mutase 2 (muscle)      | 0.13 | 0.28 | 56.91 | 0.03      |
| BC043781         | phosphoglycerate kinase 1               | NS   | NS   | 9.21  | 0.11      |
| BC044007         | pyruvate kinase, muscle                 | NS   | NS   | 15.1  | 0.09      |
| BC046864         | triosephosphate isomerase 1             | NS   | NS   | 2.42  | 0.38      |
| BC045269         | aspartate aminotransferase              | NS   | NS   | 10.44 | 0.15      |

#### Expression unchanged

|          |                                          |    |    |    |    |
|----------|------------------------------------------|----|----|----|----|
| BU900361 | glucose phosphate isomerase              | NS | NS | NS | NS |
| CB197736 | malate dehydrogenase 1                   | NS | NS | NS | NS |
| BI676084 | glyceraldehyde-3-phosphate dehydrogenase | NS | NS | NS | NS |

NS, change is not significant
