# Supplementary material
Source: PubMed Central journal article supplement (PMC1868508)
Supplement: NIHMS20514-supplement-Table4.pdf [file NIHMS20514-supplement-Table4.pdf]

**Supplementary Table 4. All mitochondrial genes on the array**

| <b>Accession number</b> | <b>Gene name</b>                               | <b>2 wk</b> | <b>6wk</b> | <b>Frog</b> | <b>Tail NF62</b> |
|-------------------------|------------------------------------------------|-------------|------------|-------------|------------------|
| CB200932                | 2,4-dienoyl CoA reductase 1, mitochondrial     | NS          | NS         | 1.60        | NS               |
| CA985796                | 3-hydroxyisobutyrate dehydrogenase             | NS          | 0.58       | NS          | NS               |
| BC059355                | 3-oxoacid CoA transferase                      | NS          | 1.48       | 3.91        | 0.23             |
| BC060364                | 4-aminobutyrate aminotransferase               | NS          | 0.57       | 0.44        | 0.24             |
| CA985080                | methyltransferase reductase                    | NS          | NS         | NS          | NS               |
| BU913531                | A kinase (PRKA) anchor protein 1               | NS          | NS         | NS          | NS               |
| BU906294                | acetyl-Coenzyme A acetyltransferase 1          | NS          | NS         | 4.63        | 0.2              |
| BC045119                | acetyl-Coenzyme A acyltransferase 2            | 1.57        | 1.86       | 4.28        | 0.29             |
| BC043756                | acyl-CoA synthetase long-chain family member 1 | NS          | NS         | 2.38        | 0.55             |
| AF186471                | aconitase 2, mitochondrial                     | NS          | 0.53       | 0.51        | NS               |
| BC056845                | acyl-Coenzyme A dehydrogenase family           | NS          | 4.08       | 11.32       | 0.57             |
| BU906737                | acyl-Coenzyme A dehydrogenase family           | NS          | NS         | NS          | NS               |
| CB205913                | acyl-Coenzyme A dehydrogenase                  | NS          | NS         | NS          | NS               |
| CD330123                | acyl-Coenzyme A dehydrogenase                  | NS          | NS         | 1.52        | NS               |
| BU905838                | acyl-Coenzyme A dehydrogenase, long chain      | NS          | NS         | NS          | NS               |
| BU903542                | acyl-Coenzyme A dehydrogenase, very long chain | NS          | NS         | NS          | NS               |
| CB198477                | adenylate kinase 1                             | NS          | NS         | 3.53        | 0.28             |
| BC041509                | adenylate kinase 2                             | NS          | NS         | NS          | NS               |
| CD302089                | AFG3 ATPase family gene 3-like 2 (yeast)       | NS          | NS         | NS          | NS               |
| AJ278065                | alanine-glyoxylate aminotransferase            | NS          | NS         | NS          | NS               |
| BJ084256                | alanine-glyoxylate aminotransferase 2          | NS          | NS         | NS          | NS               |
| BC054260                | alcohol dehydrogenase IB (class I)             | NS          | 35.87      | 90.03       | NS               |
| BC041319                | alcohol dehydrogenase 1C (class I)             | NS          | 4.99       | 4.03        | NS               |
| AB016717                | aldehyde dehydrogenase 1 family, member A1     | NS          | 5.16       | 4.50        | 1.75             |
| CA983600                | aldehyde dehydrogenase 6 family, member A1     | NS          | NS         | NS          | NS               |
| BJ628374                | alpha-methylacyl-CoA racemase                  | NS          | NS         | NS          | NS               |
| BC060364                | 4-aminobutyrate aminotransferase               | NS          | 0.57       | 0.44        | 0.24             |
| BC059988                | aminolevulinate, delta-, synthase 1            | NS          | NS         | 2.65        | NS               |

|          |                                                               |      |       |       |      |
|----------|---------------------------------------------------------------|------|-------|-------|------|
| BG811690 | aminolevulinate, delta-, synthase 2                           | NS   | NS    | NS    | NS   |
| BQ732928 | ancient ubiquitous protein 1                                  | NS   | NS    | NS    | NS   |
| BJ088766 | APEX nuclease                                                 | NS   | NS    | NS    | NS   |
| BJ057663 | apoptosis-inducing factor                                     | NS   | NS    | 0.36  | NS   |
| U08408   | arginase, type II                                             | NS   | 0.62  | 1.70  | 0.59 |
| CD257014 | ATP synthase mitochondrial F1                                 | NS   | NS    | NS    | NS   |
| CA974238 | ATP synthase mitochondrial F0, subunit c                      | NS   | NS    | 3.50  | 0.41 |
| BF232304 | ATP synthase mitochondrial F0, subunit c                      | NS   | NS    | 1.85  | 0.57 |
| CB199961 | ATP synthase mitochondrial F0, subunit e                      | NS   | NS    | 5.82  | NS   |
| BF047364 | ATP synthase mitochondrial F0, subunit f                      | NS   | NS    | 5.85  | 0.5  |
| AW634424 | ATP synthase mitochondrial F0, subunit F6                     | NS   | NS    | 5.31  | 0.56 |
| AW200171 | ATP synthase mitochondrial F0, subunit g                      | NS   | NS    | 4.37  | NS   |
| BG022685 | ATP synthase mitochondrial F0, subunit s                      | NS   | NS    | NS    | NS   |
| BC054959 | ATP synthase mitochondrial F1, alpha subunit                  | NS   | NS    | 4.82  | 0.24 |
| AW200073 | ATP synthase mitochondrial F1, delta subunit                  | NS   | NS    | 4.76  | 0.39 |
| AW199873 | ATP synthase, mitochondrial F1, O subunit                     | NS   | NS    | 2.86  | 0.29 |
| BF614639 | ATPase inhibitory factor 1                                    | NS   | NS    | 6.91  | NS   |
| BJ047094 | ATPase, Ca <sup>++</sup> -sequestering                        | NS   | 23.56 | 63.31 | NS   |
| BC060332 | ATPase, Na <sup>+</sup> /K <sup>+</sup> transporting, alpha 2 | 0.55 | 2.10  | 8.30  | NS   |
| M37788   | ATPase, Na <sup>+</sup> /K <sup>+</sup> transporting, beta 3  | NS   | NS    | 0.22  | NS   |
| AW159034 | ATP-binding cassette, sub-family A                            | NS   | NS    | 1.28  | NS   |
| BJ641583 | ATP-binding cassette, sub-family B                            | NS   | NS    | NS    | NS   |
| BC046573 | ATP-binding cassette, sub-family E                            | NS   | NS    | NS    | NS   |
| BC046677 | ATP-binding cassette, sub-family F                            | NS   | NS    | NS    | NS   |
| CF342434 | AU RNS binding protein                                        | NS   | NS    | 1.37  | NS   |
| BC043771 | BAF53                                                         | NS   | 0.46  | 0.22  | NS   |
| BC060010 | BCL2                                                          | NS   | 1.44  | 3.33  | NS   |
| BU910040 | BCL2                                                          | NS   | NS    | 1.89  | NS   |
| AF288809 | BCL2-associated X protein                                     | NS   | NS    | 0.42  | 0.65 |
| BC045021 | BCS1-like (yeast)                                             | NS   | NS    | NS    | NS   |
| BF049428 | BH3 interacting domain death agonist                          | NS   | NS    | NS    | NS   |

|          |                                                  |      |      |       |      |
|----------|--------------------------------------------------|------|------|-------|------|
| BU916064 | benzodiazapine receptor associated protein 1     | NS   | 0.64 | 2.56  | 0.61 |
| BU903336 | branched chain keto acid dehydrogenase E1, alpha | NS   | NS   | 1.33  | NS   |
| AW199247 | branched chain keto acid dehydrogenase E1, beta  | NS   | NS   | NS    | NS   |
| BC056033 | calcium-binding transporter                      | NS   | NS   | NS    | 2.02 |
| BC046947 | calsequestrin 1 (fast-twitch, skeletal muscle)   | 0.17 | 0.39 | 69.63 | 0.27 |
| BU910733 | carnitine acetyltransferase                      | NS   | NS   | NS    | 1.45 |
| BC048219 | carnitine palmitoyltransferase 1A (liver)        | NS   | NS   | 0.41  | 4.28 |
| CD329151 | carnitine palmitoyltransferase 1B (muscle)       | NS   | NS   | 1.29  | 0.73 |
| BC045036 | carnitine palmitoyltransferase II                | NS   | NS   | NS    | NS   |
| AB038171 | caspase 8, apoptosis-related cysteine protease   | NS   | NS   | NS    | NS   |
| AW200173 | ceroid-lipofuscinosis, neuronal 3, juvenile      | NS   | NS   | NS    | 1.41 |
| BC046571 | citrate synthase                                 | NS   | NS   | 3.66  | 0.55 |
| BC046726 | CGI-51 protein                                   | NS   | NS   | 2.76  | 0.46 |
| CD254125 | CGI-69 protein                                   | NS   | NS   | NS    | NS   |
| CF547537 | choline dehydrogenase                            | 0.35 | 0.35 | 9.18  | NS   |
| BG017815 | chromosome 3 open reading frame 1                | NS   | NS   | NS    | NS   |
| BC059342 | chromosome 10 open reading frame 70              | NS   | 0.68 | NS    | 1.36 |
| BF048406 | chromosome 14 open reading frame 2               | NS   | NS   | NS    | NS   |
| CA983055 | chromosome 15 open reading frame 12              | NS   | NS   | 1.84  | 0.39 |
| BC047977 | chromosome 20 open reading frame 45              | NS   | NS   | NS    | NS   |
| BC046571 | citrate synthase                                 | NS   | NS   | 3.66  | 0.55 |
| AW148132 | ClpP caseinolytic protease, ATP-dependent        | NS   | NS   | 1.36  | NS   |
| BQ728266 | ClpX caseinolytic protease X homolog (E. coli)   | NS   | NS   | 1.75  | NS   |
| BX854994 | coenzyme Q3 homolog, methyltransferase (yeast)   | NS   | NS   | 2.07  | NS   |
| BC045084 | complement component 1                           | NS   | NS   | NS    | NS   |
| BX850323 | COX10 homolog                                    | NS   | NS   | 1.28  | NS   |
| BX850630 | COX15 homolog                                    | NS   | NS   | NS    | NS   |
| BC044015 | creatine kinase, mitochondrial 1 (ubiquitous)    | NS   | 1.53 | 1.44  | 1.41 |
| CA986836 | cyclin M4                                        | NS   | NS   | 1.89  | NS   |
| AY049033 | cryptochrome 1 (photolyase-like)                 | NS   | NS   | NS    | NS   |
| BX847508 | cytochrome c oxidase assembly protein            | 0.39 | NS   | 10.53 | 0.23 |

|          |                                                  |    |      |      |      |
|----------|--------------------------------------------------|----|------|------|------|
| CA973104 | cytochrome c oxidase subunit IV isoform 1        | NS | NS   | 1.63 | NS   |
| BU904087 | cytochrome c oxidase subunit IV isoform 2        | NS | NS   | 5.34 | NS   |
| AW642654 | cytochrome c oxidase subunit Vb                  | NS | NS   | 1.61 | 0.39 |
| BU901473 | cytochrome c oxidase subunit VIc                 | NS | NS   | 2.89 | NS   |
| BQ736895 | cytochrome c oxidase subunit VIIa                | NS | NS   | 1.32 | NS   |
| BF611222 | cytochrome c oxidase subunit VIIa                | NS | NS   | 5.65 | 0.33 |
| CB200109 | cytochrome c oxidase subunit VIIb                | NS | NS   | NS   | NS   |
| AW200424 | cytochrome c oxidase subunit VIIc                | NS | 2.59 | 5.73 | 0.53 |
| CA787861 | cytochrome c, somatic                            | NS | NS   | 0.50 | 2.14 |
| BC045127 | cytochrome c-1                                   | NS | NS   | 3.58 | 0.28 |
| BC059990 | cyt. P450, family 2, subfamily C, polypeptide 18 | NS | 2.21 | 2.34 | NS   |
| BC045126 | cyt. P450, family 2, subfamily C, polypeptide 8  | NS | 0.30 | 0.15 | NS   |
| BU914112 | cyt. P450, family 2, subfamily J, polypeptide 2  | NS | 1.66 | 2.30 | NS   |
| BJ051368 | cyt. P450, family 11, subfamily A, polypeptide 1 | NS | NS   | NS   | NS   |
| CD328173 | cyt. P450, family 27, subfamily A, polypeptide 1 | NS | NS   | NS   | NS   |
| BC046696 | DEAD (Asp-Glu-Ala-As) box polypeptide 19         | NS | NS   | 0.56 | NS   |
| BU911969 | DEAD (Asp-Glu-Ala-Asp) box polypeptide 1         | NS | NS   | 1.48 | NS   |
| CB983629 | DEAD (Asp-Glu-Ala-Asp) box polypeptide 10        | NS | NS   | 1.28 | NS   |
| BC054181 | DEAD (Asp-Glu-Ala-Asp) box polypeptide 17        | NS | NS   | NS   | NS   |
| BU903342 | DEAD (Asp-Glu-Ala-Asp) box polypeptide 18        | NS | NS   | NS   | NS   |
| AF302422 | DEAD (Asp-Glu-Ala-Asp) box polypeptide 21        | NS | NS   | NS   | NS   |
| CA790684 | DEAD (Asp-Glu-Ala-Asp) box polypeptide 23        | NS | NS   | 0.30 | NS   |
| BC043900 | DEAD (Asp-Glu-Ala-Asp) box polypeptide 24        | NS | 0.58 | 0.38 | 1.53 |
| BQ736775 | DEAD (Asp-Glu-Ala-Asp) box polypeptide 27        | NS | NS   | NS   | NS   |
| BC044972 | DEAD (Asp-Glu-Ala-Asp) box polypeptide 3         | NS | 0.66 | 0.31 | 3.68 |
| BX850995 | DEAD (Asp-Glu-Ala-Asp) box polypeptide 31        | NS | NS   | NS   | NS   |
| AY298950 | DEAD (Asp-Glu-Ala-Asp) box polypeptide 39        | NS | 0.60 | 0.38 | NS   |
| CB565324 | DEAD (Asp-Glu-Ala-Asp) box polypeptide 41        | NS | NS   | 1.30 | 0.71 |
| BC043977 | DEAD (Asp-Glu-Ala-Asp) box polypeptide 42        | NS | 0.57 | 0.56 | NS   |
| BU908294 | DEAD (Asp-Glu-Ala-Asp) box polypeptide 46        | NS | NS   | 1.72 | NS   |
| BU913273 | DEAD (Asp-Glu-Ala-Asp) box polypeptide 47        | NS | 0.75 | 0.39 | NS   |

|          |                                                   |      |      |      |      |
|----------|---------------------------------------------------|------|------|------|------|
| AF020432 | DEAD (Asp-Glu-Ala-Asp) box polypeptide 48         | NS   | 0.69 | 0.45 | 1.46 |
| BC047981 | DEAD (Asp-Glu-Ala-Asp) box polypeptide 5          | NS   | 0.63 | 0.29 | 2.25 |
| BJ072880 | DEAH (Asp-Glu-Ala-His) box polypeptide 16         | NS   | 0.58 | 0.39 | NS   |
| BF231944 | DEAH (Asp-Glu-Ala-His) box polypeptide 32         | NS   | NS   | NS   | NS   |
| BU908693 | DEAH (Asp-Glu-Ala-His) box polypeptide 33         | NS   | NS   | NS   | 0.72 |
| CD329926 | DEAH (Asp-Glu-Ala-His) box polypeptide 36         | NS   | NS   | NS   | NS   |
| BQ735410 | DEAH (Asp-Glu-Ala-His) box polypeptide 37         | NS   | 0.75 | NS   | 0.71 |
| CF270695 | DEAH (Asp-Glu-Ala-His) box polypeptide 38         | NS   | 0.73 | 0.45 | NS   |
| CA987430 | DEAH (Asp-Glu-Ala-His) box polypeptide 8          | NS   | NS   | NS   | NS   |
| BQ730824 | death associated protein 3                        | NS   | NS   | NS   | 0.64 |
| CA981516 | deoxyguanosine kinase                             | NS   | NS   | NS   | NS   |
| BC045265 | diaphorase (NSDH) (cytochrome b-5 reductase)      | NS   | NS   | 2.22 | NS   |
| BC056016 | dihydrolipoamide dehydrogenase (E3)               | NS   | NS   | 2.96 | 0.33 |
| AF430140 | dihydrolipoamide S-acetyltransferase (E2)         | NS   | NS   | 3.88 | 0.28 |
| BC045016 | dihydrolipoamide S-succinyltransferase (E2)       | NS   | NS   | 2.73 | 0.35 |
| CB560368 | dihydroorotate dehydrogenase                      | NS   | NS   | NS   | NS   |
| BF614590 | DnaJ (Hsp40) homolog, subfamily A, member 3       | NS   | NS   | 1.83 | NS   |
| BQ886013 | dodecenoyl-Coenzyme A delta isomerase             | NS   | NS   | 1.31 | NS   |
| BF611044 | dUTP pyrophosphatase                              | NS   | NS   | NS   | NS   |
| BC044291 | dynamamin 1-like                                  | NS   | NS   | 1.78 | 0.47 |
| CB563541 | electron-transfer-flavoprotein, alpha polypeptide | NS   | NS   | 1.34 | NS   |
| BC059787 | electron-transfer-flavoprotein, beta polypeptide  | NS   | NS   | 2.33 | 0.33 |
| CB563356 | electron-transferring-flavoprotein dehydrogenase  | NS   | NS   | 1.35 | NS   |
| AW199936 | endonuclease G                                    | NS   | NS   | NS   | NS   |
| CD327268 | enoyl Coenzyme A hydratase, short chain, 1        | NS   | NS   | NS   | NS   |
| BX846352 | ferredoxin 1                                      | NS   | NS   | NS   | NS   |
| BG555184 | ferredoxin reductase                              | NS   | NS   | 1.32 | NS   |
| AF036617 | ferrochelataase (protoporphyrin)                  | 1.59 | NS   | NS   | NS   |
| CB560500 | FGF (acidic) intracellular binding protein        | NS   | NS   | 1.48 | NS   |
| AW200147 | fracture callus 1 homolog (rat)                   | NS   | NS   | 1.31 | NS   |
| BM191282 | fumarate hydratase                                | NS   | NS   | NS   | 0.55 |

|          |                                                   |    |      |       |       |
|----------|---------------------------------------------------|----|------|-------|-------|
| X91241   | GA binding protein transcription factor           | NS | NS   | NS    | NS    |
| CA792603 | gamma-SNSP-associated factor 1                    | NS | NS   | NS    | NS    |
| X93494   | glucokinase (hexokinase 4)                        | NS | NS   | NS    | 4.35  |
| BC045269 | glutamic-oxaloacetic transaminase 1, soluble      | NS | NS   | 10.44 | 0.15  |
| BC057752 | glutaminyl-tRNS synthetase                        | NS | NS   | NS    | 0.6   |
| CA984722 | glutaredoxin 2                                    | NS | NS   | 1.27  | NS    |
| BX852732 | glutaryl-Coenzyme A dehydrogenase                 | NS | NS   | NS    | 0.65  |
| CD327647 | glutathione peroxidase 4                          | NS | 1.51 | 2.12  | NS    |
| CD328025 | glutathione reductase                             | NS | 1.49 | 1.56  | 2.95  |
| BC054290 | glutathione S-transferase subunit 13 homolog      | NS | NS   | 2.24  | 0.43  |
| CF282829 | glutathione transferase zeta 1                    | NS | NS   | NS    | NS    |
| BG016726 | glycerol-3-phosphate dehydrogenase 2              | NS | NS   | 1.67  | NS    |
| BC056091 | glycerol kinase                                   | NS | NS   | 0.48  | NS    |
| BC047258 | glycine C-acetyltransferase                       | NS | NS   | NS    | 0.2   |
| CA790387 | glycine cleavage system protein H                 | NS | NS   | NS    | NS    |
| BC042245 | glycine dehydrogenase                             | NS | 1.94 | NS    | 10.15 |
| BX847396 | growth factor, augmenter of liver regeneration    | NS | 0.62 | NS    | NS    |
| CA973271 | GrpE-like 1, mitochondrial (E. coli)              | NS | NS   | NS    | NS    |
| BC041192 | heat shock 60kDa protein 1 (chaperonin)           | NS | NS   | 0.43  | NS    |
| BC045130 | heat shock 70kDa protein 9B (mortalin-2)          | NS | NS   | NS    | NS    |
| BQ730744 | hepatocellularcarcinoma-associated antigen        | NS | NS   | NS    | 0.45  |
| AF288471 | hexokinase 1                                      | NS | NS   | 2.45  | 0.68  |
| BJ077643 | hexokinase 2                                      | NS | NS   | NS    | NS    |
| BC045005 | holocytochrome c synthase                         | NS | 0.68 | 2.45  | 0.43  |
| BC043800 | HS1 binding protein                               | NS | NS   | NS    | NS    |
| CA982774 | hydroxyacyl-Coenzyme A dehydrogenase, type II     | NS | NS   | 2.50  | 0.19  |
| BX845168 | hydroxyacyl-Coenzyme A dehydrogenase              | NS | NS   | NS    | NS    |
| CA982303 | hypothetical protein LOC114971                    | NS | NS   | 3.34  | 0.41  |
| BC059996 | hypothetical protein MGC10940                     | NS | NS   | 2.69  | 0.39  |
| BC041326 | inner membrane protein, mitochondrial (mitofilin) | NS | NS   | 2.65  | NS    |
| BC046379 | isocitrate dehydrogenase 2 (NSDP+)                | NS | NS   | 4.49  | 0.32  |

|          |                                                          |    |      |      |      |
|----------|----------------------------------------------------------|----|------|------|------|
| BU913373 | isocitrate dehydrogenase 3 (NSD+) alpha                  | NS | NS   | 2.14 | 0.30 |
| CD326544 | isocitrate dehydrogenase 3 (NSD+) beta                   | NS | NS   | 1.34 | NS   |
| CB560638 | isovaleryl Coenzyme A dehydrogenase                      | NS | NS   | 1.58 | NS   |
| BG017947 | kinesin family member 1B                                 | NS | 2.35 | 4.46 | NS   |
| BU912905 | lactamase, beta                                          | NS | 0.62 | 0.54 | NS   |
| BC054257 | lactate dehydrogenase B                                  | NS | NS   | 2.65 | 0.24 |
| CB755986 | lactate dehydrogenase D                                  | NS | NS   | NS   | NS   |
| BG811792 | lamin B2                                                 | NS | NS   | NS   | 0.67 |
| BJ051530 | leucine zipper transmembrane protein 1                   | NS | NS   | 1.43 | NS   |
| BQ384499 | leucyl-tRNS synthetase 2, mitochondrial                  | NS | NS   | NS   | NS   |
| BU912960 | ortholog of acyl-Coenzyme A thioesterase 2               | NS | NS   | NS   | NS   |
| BQ734373 | lipoic acid synthetase                                   | NS | NS   | NS   | NS   |
| AW634109 | low molecular mass ubiquinone-binding protein            | NS | NS   | 4.55 | 0.21 |
| BC047965 | lysyl-tRNS synthetase                                    | NS | NS   | NS   | 0.52 |
| CB197736 | malate dehydrogenase 1, NSD (soluble)                    | NS | NS   | NS   | NS   |
| CB564949 | malate dehydrogenase 2, NSD (mitochondrial)              | NS | NS   | NS   | 2.06 |
| AY225508 | malic enzyme 2, NSD(+)-dependent                         | NS | NS   | NS   | NS   |
| CA972298 | mercaptopyruvate sulfurtransferase                       | NS | NS   | NS   | NS   |
| CB592873 | mature T-cell proliferation 1                            | NS | NS   | 2.08 | 0.67 |
| CA793260 | metaxin 2                                                | NS | NS   | NS   | NS   |
| BJ063128 | methylcrotonoyl-Coenzyme A carboxylase 2 (beta)          | NS | NS   | 1.49 | 0.31 |
| BX843287 | methylene tetrahydrofolate dehydrogenase                 | NS | NS   | NS   | 0.49 |
| BE576457 | methylmalonyl Coenzyme A mutase                          | NS | NS   | 1.42 | NS   |
| CB942903 | microsomal glutathione S-transferase 1                   | NS | 1.70 | NS   | 2.26 |
| BJ071086 | mitochondria-associated protein                          | NS | NS   | 1.74 | 0.38 |
| BC043834 | mitochondrial Ca <sup>2+</sup> -dependent solute carrier | NS | NS   | NS   | 0.98 |
| AB046536 | mitochondrial carrier homolog 2 (C. elegans)             | NS | NS   | NS   | NS   |
| BE669338 | mitochondrial elongation factor G1                       | NS | NS   | NS   | NS   |
| BU911836 | mitochondrial elongation factor G2                       | NS | NS   | NS   | NS   |
| BJ068351 | mitochondrial folate transporter/carrier                 | NS | NS   | NS   | NS   |
| BG017618 | mitochondrial inner membrane                             | NS | NS   | 5.26 | 0.35 |

|          |                                      |    |      |      |      |
|----------|--------------------------------------|----|------|------|------|
| CA983147 | mitochondrial intermediate peptidase | NS | NS   | 1.32 | NS   |
| BU914057 | mitochondrial ribosomal protein L11  | NS | NS   | NS   | NS   |
| CB564293 | mitochondrial ribosomal protein L12  | NS | NS   | NS   | NS   |
| BE189856 | mitochondrial ribosomal protein L13  | NS | NS   | 1.78 | 0.4  |
| CA987817 | mitochondrial ribosomal protein L15  | NS | 0.71 | 1.67 | NS   |
| BF231755 | mitochondrial ribosomal protein L16  | NS | NS   | NS   | NS   |
| BC056073 | mitochondrial ribosomal protein L18  | NS | NS   | NS   | NS   |
| BX847608 | mitochondrial ribosomal protein L19  | NS | NS   | NS   | NS   |
| CF547623 | mitochondrial ribosomal protein L2   | NS | NS   | NS   | 0.62 |
| BF232199 | mitochondrial ribosomal protein L21  | NS | NS   | NS   | NS   |
| CA974358 | mitochondrial ribosomal protein L23  | NS | NS   | NS   | NS   |
| CD254126 | mitochondrial ribosomal protein L24  | NS | NS   | 1.44 | NS   |
| AW200559 | mitochondrial ribosomal protein L27  | NS | NS   | NS   | NS   |
| CD362208 | mitochondrial ribosomal protein L28  | NS | NS   | NS   | NS   |
| BJ633986 | mitochondrial ribosomal protein L3   | NS | NS   | NS   | NS   |
| BF025307 | mitochondrial ribosomal protein L30  | NS | NS   | 1.35 | NS   |
| AW633046 | mitochondrial ribosomal protein L33  | NS | NS   | 1.36 | NS   |
| AW638425 | mitochondrial ribosomal protein L34  | NS | NS   | 1.83 | 0.54 |
| BU910452 | mitochondrial ribosomal protein L36  | NS | NS   | NS   | NS   |
| BE507247 | mitochondrial ribosomal protein L38  | NS | 0.54 | NS   | NS   |
| BX855294 | mitochondrial ribosomal protein L39  | NS | NS   | NS   | 0.49 |
| CD328019 | mitochondrial ribosomal protein L4   | NS | NS   | NS   | 0.44 |
| BE491189 | mitochondrial ribosomal protein L41  | NS | NS   | 1.75 | NS   |
| AW199995 | mitochondrial ribosomal protein L42  | NS | NS   | NS   | NS   |
| CA982235 | mitochondrial ribosomal protein L43  | NS | NS   | 1.42 | NS   |
| BC054195 | mitochondrial ribosomal protein L44  | NS | NS   | NS   | 1.67 |
| BC043883 | mitochondrial ribosomal protein L45  | NS | NS   | NS   | NS   |
| AW765260 | mitochondrial ribosomal protein L46  | NS | NS   | NS   | NS   |
| BQ733050 | mitochondrial ribosomal protein L47  | NS | NS   | 1.31 | NS   |
| BU914939 | mitochondrial ribosomal protein L48  | NS | NS   | NS   | NS   |
| AW635120 | mitochondrial ribosomal protein L49  | NS | NS   | NS   | NS   |



|          |                                              |    |      |      |      |
|----------|----------------------------------------------|----|------|------|------|
| CB199839 | mitochondrial ribosomal protein L51          | NS | NS   | 1.52 | NS   |
| CB206130 | mitochondrial ribosomal protein L53          | NS | NS   | NS   | NS   |
| BC057214 | mitochondrial ribosomal protein L55          | NS | 0.69 | 1.97 | NS   |
| CA971767 | mitochondrial ribosomal protein L9           | NS | NS   | NS   | NS   |
| CA973955 | mitochondrial ribosomal protein S11          | NS | NS   | 1.30 | NS   |
| BC054176 | mitochondrial ribosomal protein S12          | NS | 0.70 | 0.53 | NS   |
| BX852636 | mitochondrial ribosomal protein S15          | NS | NS   | 1.99 | 0.59 |
| CA972373 | mitochondrial ribosomal protein S18A         | NS | NS   | NS   | 0.48 |
| CD361615 | mitochondrial ribosomal protein S18B         | NS | NS   | NS   | NS   |
| BG017586 | mitochondrial ribosomal protein S18C         | NS | NS   | NS   | NS   |
| CA982629 | mitochondrial ribosomal protein S2           | NS | NS   | NS   | NS   |
| BX845410 | mitochondrial ribosomal protein S21          | NS | NS   | 2.04 | 0.52 |
| CD301940 | mitochondrial ribosomal protein S22          | NS | 0.70 | 0.58 | NS   |
| BG038466 | mitochondrial ribosomal protein S23          | NS | NS   | NS   | NS   |
| BX844293 | mitochondrial ribosomal protein S24          | NS | NS   | NS   | 0.55 |
| BQ736891 | mitochondrial ribosomal protein S25          | NS | NS   | NS   | NS   |
| CA984964 | mitochondrial ribosomal protein S26          | NS | NS   | 1.36 | NS   |
| AF317657 | mitochondrial ribosomal protein S30          | NS | NS   | NS   | 0.54 |
| BQ736407 | mitochondrial ribosomal protein S31          | NS | NS   | 1.45 | 0.51 |
| AW200124 | mitochondrial ribosomal protein S33          | NS | NS   | 1.34 | NS   |
| BC046672 | mitochondrial ribosomal protein S34          | NS | 1.45 | 1.70 | 0.59 |
| BU900323 | mitochondrial ribosomal protein S35          | NS | NS   | NS   | NS   |
| BX849854 | mitochondrial ribosomal protein S5           | NS | NS   | NS   | 0.63 |
| BU909298 | mitochondrial ribosomal protein S7           | NS | 0.72 | NS   | NS   |
| CA982088 | mitochondrial ribosomal protein S9           | NS | NS   | NS   | 0.48 |
| BJ634092 | mitochondrial translational release factor 1 | NS | NS   | NS   | NS   |
| CD257058 | mitofusin 1                                  | NS | NS   | 1.29 | NS   |
| AF411518 | mitotic phosphoprotein 44                    | NS | NS   | NS   | 1.4  |
| CD325780 | NSDH dehydrogenase 1 subcomplex, 10, 42kDa   | NS | NS   | NS   | NS   |
| CB593190 | NSDH dehydrogenase 1 subcomplex, 11, 14.7kDa | NS | NS   | 2.13 | 0.63 |
| BF072406 | NSDH dehydrogenase 1, 3, 9kDa                | NS | NS   | NS   | NS   |

|          |                                                   |      |      |       |      |
|----------|---------------------------------------------------|------|------|-------|------|
| CB592997 | NSDH dehydrogenase 1, 4, 9kDa                     | NS   | NS   | NS    | NS   |
| BX848879 | NSDH dehydrogenase 1, 7, 14.5kDa                  | NS   | NS   | 3.96  | NS   |
| BE491088 | NSDH dehydrogenase 1, 8, 19kDa                    | NS   | NS   | 2.25  | NS   |
| BC054183 | NSDH dehydrogenase 1, 9, 39kDa                    | NS   | NS   | 4.11  | 0.49 |
| CB592100 | NSDH dehydrogenase 1, 1, 8kDa                     | NS   | NS   | 5.87  | 0.27 |
| AW636101 | NSDH dehydrogenase 1 beta, 1, 7kDa                | NS   | NS   | 2.94  | NS   |
| BG017514 | NSDH dehydrogenase 1 beta, 2, 8kDa                | NS   | NS   | NS    | NS   |
| BX848343 | NSDH dehydrogenase 1 beta, 4, 15kDa               | NS   | NS   | 3.18  | 0.47 |
| BQ731027 | NSDH dehydrogenase 1 beta, 5, 16kDa               | NS   | NS   | 4.19  | 0.34 |
| CA790567 | NSDH dehydrogenase 1 beta, 7, 18kDa               | NS   | NS   | NS    | NS   |
| BJ046642 | NSDH dehydrogenase 1 beta, 8, 19kDa               | NS   | NS   | NS    | NS   |
| BG264283 | NSDH dehydrogenase 1, 1, 6kDa                     | NS   | NS   | 2.38  | NS   |
| AW200445 | NSDH dehydrogenase 1, 2, 14.5kDa                  | NS   | NS   | 4.64  | 0.47 |
| BC049394 | NSDH dehydrogenase Fe-S protein 1, 75kDa          | NS   | NS   | 4.90  | 0.39 |
| CD330070 | NSDH dehydrogenase Fe-S protein 2, 49kDa          | NS   | NS   | 1.50  | NS   |
| BG162895 | NSDH dehydrogenase Fe-S protein 4, 18kDa          | NS   | NS   | 70.84 | 4.35 |
| BC056098 | NSDH dehydrogenase Fe-S protein 5, 15kDa          | NS   | NS   | 4.16  | NS   |
| AW147428 | NSDH dehydrogenase Fe-S protein 6, 13kDa          | NS   | NS   | 3.73  | 0.4  |
| CB756825 | NSDH dehydrogenase Fe-S protein 7, 20kDa          | NS   | NS   | 2.09  | 0.47 |
| BQ728220 | NSDH dehydrogenase Fe-S protein 8, 23kDa          | NS   | NS   | 2.66  | 0.42 |
| BC041320 | NSDH dehydrogenase flavoprotein 1, 51kDa          | NS   | NS   | 2.52  | 0.34 |
| BX847160 | NSDH dehydrogenase flavoprotein 2, 24kDa          | NS   | NS   | NS    | NS   |
| BU912967 | neighbor of COX4                                  | NS   | NS   | NS    | NS   |
| BU911678 | NFS1 nitrogen fixation 1 ( <i>S. cerevisiae</i> ) | NS   | NS   | NS    | NS   |
| BX850790 | nipsnap homolog 1 ( <i>C. elegans</i> )           | NS   | NS   | 1.38  | NS   |
| BC054995 | nitrogen fixation cluster-like                    | NS   | 1.68 | 2.31  | NS   |
| CA982524 | non-metastatic cells 4                            | NS   | NS   | NS    | NS   |
| X70700   | nuclear receptor subfamily 4, group A, member 1   | 1.92 | NS   | NS    | NS   |
| BG020592 | nuclear respiratory factor 1                      | NS   | NS   | NS    | NS   |
| CA794167 | nucleoporin 50kDa                                 | NS   | NS   | NS    | NS   |
| BC045249 | ornithine aminotransferase (gyrate atrophy)       | NS   | NS   | 2.47  | 0.15 |

|          |                                                    |    |      |      |      |
|----------|----------------------------------------------------|----|------|------|------|
| AF134842 | ornithine carbamoyltransferase                     | NS | NS   | NS   | NS   |
| BJ049708 | peptidase (mitochondrial processing) beta          | NS | NS   | NS   | NS   |
| BU903448 | peptidylprolyl isomerase F (cyclophilin F)         | NS | NS   | NS   | NS   |
| CA980988 | peroxiredoxin 3                                    | NS | NS   | 7.23 | NS   |
| BU901799 | peroxiredoxin 5                                    | NS | NS   | 1.44 | NS   |
| BJ052494 | peroxisome proliferative activated receptor, gamma | NS | NS   | 1.42 | NS   |
| BX851179 | phenylalanine-tRNS synthetase 1 (mitochondrial)    | NS | NS   | NS   | NS   |
| CA790765 | phosphatidylethanolamine N-methyltransferase       | NS | NS   | 0.40 | NS   |
| BC044042 | phosphoenolpyruvate carboxykinase 2                | NS | 1.55 | 1.39 | 3.16 |
| U49509   | polymerase (DNS directed), gamma                   | NS | NS   | NS   | NS   |
| AF124606 | polymerase (DNS directed), gamma 2                 | NS | NS   | 1.42 | 0.29 |
| AF200705 | polymerase (RNS) mitochondrial (DNS directed)      | NS | 0.47 | 0.44 | NS   |
| BQ734970 | programmed cell death 8                            | NS | NS   | NS   | NS   |
| CA982783 | progressive external ophthalmoplegia 1             | NS | 0.55 | 0.46 | NS   |
| BC059998 | proline dehydrogenase (oxidase) 2                  | NS | NS   | 1.53 | NS   |
| BC046371 | propionyl Coenzyme A carboxylase, beta             | NS | 0.70 | 1.87 | 0.52 |
| BX842761 | protease, serine, 15                               | NS | 0.62 | NS   | NS   |
| CB943549 | protease, serine, 25                               | NS | NS   | NS   | 0.52 |
| AJ413218 | protein kinase, cAMP-dependent, catalytic, alpha   | NS | NS   | 2.23 | 0.33 |
| BC042272 | protein phosphatase 2, alpha                       | NS | NS   | 0.54 | NS   |
| Z50852   | protein phosphatase 2, beta                        | NS | NS   | NS   | NS   |
| BC046723 | protein phosphatase 2, regulatory subunit A, alpha | NS | NS   | NS   | NS   |
| BC043624 | protein phosphatase 2, regulatory subunit A, beta  | NS | 0.63 | 0.28 | 2.21 |
| CA788657 | protoporphyrinogen oxidase                         | NS | NS   | NS   | NS   |
| BU913808 | pyrroline-5-carboxylate synthetase                 | NS | NS   | NS   | NS   |
| BC059308 | pyruvate carboxylase                               | NS | NS   | NS   | NS   |
| BU912197 | pyruvate dehydrogenase (lipoamide) alpha 1         | NS | 0.74 | NS   | NS   |
| U39669   | pyruvate dehydrogenase (lipoamide) beta            | NS | NS   | 5.35 | 0.38 |
| BI443644 | pyruvate dehydrogenase complex, component X        | NS | NS   | NS   | NS   |
| CD301701 | pyruvate dehydrogenase kinase, isoenzyme 1         | NS | NS   | 1.38 | NS   |
| BC059972 | pyruvate dehydrogenase kinase, isoenzyme 2         | NS | NS   | 5.95 | 0.42 |

|          |                                                                  |      |      |       |      |
|----------|------------------------------------------------------------------|------|------|-------|------|
| BJ072373 | sarcosine dehydrogenase                                          | NS   | 1.35 | NS    | NS   |
| BX846035 | SCO cytochrome oxidase deficient homolog 2                       | NS   | NS   | NS    | NS   |
| BX846343 | Septin4                                                          | NS   | NS   | 21.59 | 0.23 |
| BU903870 | serine hydroxymethyltransferase 2 (mitochondrial)                | NS   | NS   | NS    | NS   |
| BC044027 | sideroflexin 1                                                   | NS   | 1.61 | 1.39  | NS   |
| BQ731316 | sideroflexin 2                                                   | NS   | NS   | NS    | NS   |
| BU906836 | small fragment nuclease                                          | NS   | NS   | 0.57  | 1.61 |
| BC043827 | solute carrier family (SCF) 25, member 20                        | NS   | NS   | 2.10  | 0.37 |
| BX855266 | SCF 25, member 12                                                | NS   | 1.54 | 16.97 | 0.32 |
| AW147976 | SCF 25, member 14                                                | NS   | NS   | 1.54  | NS   |
| BC063272 | SCF 25, member 22                                                | NS   | 0.67 | 0.20  | 2.71 |
| BC043821 | SCF 25, mitochondrial carrier 5                                  | NS   | NS   | NS    | NS   |
| CB984281 | SCF 25; adenine nucleotide translocator 6                        | 0.68 | NS   | 5.90  | 0.24 |
| BC041303 | SCF 25; citrate transporter 1                                    | NS   | 1.47 | NS    | 2.04 |
| CD325149 | SCF 25; dicarboxylate transporter 10                             | NS   | NS   | NS    | NS   |
| CD361287 | SCF 25; oxoglutarate carrier 11                                  | NS   | NS   | 1.57  | 0.59 |
| CA788199 | SCF 25; Graves disease autoantigen 16                            | NS   | NS   | NS    | NS   |
| AJ289240 | SCF 25; peroxisomal membrane protein 17                          | NS   | NS   | NS    | 2.21 |
| BC041746 | SCF 27 (fatty acid transporter), member 2                        | NS   | NS   | NS    | 1.60 |
| BC041739 | SCF 25, member 13 (citrin)                                       | NS   | NS   | 0.51  | NS   |
| BQ731606 | spastic paraplegia 7                                             | NS   | NS   | NS    | NS   |
| CA971268 | START domain containing 3                                        | NS   | NS   | NS    | NS   |
| AF220437 | steroidogenic acute regulatory protein                           | NS   | NS   | NS    | NS   |
| CA973597 | sterol carrier protein 2                                         | NS   | NS   | NS    | 1.83 |
| BC060446 | succinate dehydrogenase complex, subunit A                       | NS   | NS   | 2.63  | 0.34 |
| BC043859 | succinate dehydrogenase complex, subunit B                       | NS   | NS   | 3.40  | 0.55 |
| BG515438 | succinate dehydrogenase complex, subunit C                       | NS   | NS   | 2.02  | NS   |
| CB209584 | succinate-CoA ligase, ADP-forming, beta subunit                  | NS   | NS   | NS    | NS   |
| CB984324 | succinate-CoA ligase, GDP-forming, alpha subunit                 | NS   | NS   | NS    | NS   |
| BC054152 | sulfide quinone reductase-like (yeast)                           | NS   | 1.59 | 3.61  | NS   |
| BJ055826 | superkiller viralicidic activity 2-like ( <i>S. cerevisiae</i> ) | NS   | NS   | NS    | NS   |

|          |                                                      |    |      |      |      |
|----------|------------------------------------------------------|----|------|------|------|
| AY362041 | superoxide dismutase 2, mitochondrial                | NS | NS   | 5.91 | 0.51 |
| BC048022 | testis specific, 10                                  | NS | NS   | NS   | NS   |
| BC043794 | thioredoxin 2                                        | NS | NS   | 1.35 | 0.36 |
| BC056010 | transcription factor B1, mitochondrial               | S  | NS   | NS   | 2.13 |
| BJ068643 | transcription termination factor, mitochondrial      | NS | NS   | 2.09 | NS   |
| BX853789 | translocase of inner mit. membrane 10                | NS | NS   | NS   | NS   |
| CB592622 | translocase of inner mit. membrane 13                | NS | NS   | NS   | NS   |
| CF289735 | translocase of inner mit. membrane 17 homolog A      | NS | NS   | 2.44 | NS   |
| CB196995 | translocase of inner mit. membrane 8 homolog B       | NS | NS   | 2.64 | NS   |
| BU915468 | translocase of outer mit. membrane 20 homolog        | NS | NS   | NS   | NS   |
| BU899392 | translocase of outer mit. membrane 22 homolog        | NS | NS   | NS   | NS   |
| CA972814 | translocase of inner mit. membrane 23 homolog        | NS | NS   | NS   | NS   |
| BC044706 | translocase of outer mit. membrane 40 homolog        | NS | NS   | NS   | NS   |
| CA971415 | translocase of inner mit. membrane 44 homolog        | NS | NS   | NS   | NS   |
| BE026643 | translocase of outer mit..l membrane 7 homolog       | NS | NS   | 1.91 | NS   |
| BC059994 | translocase of outer mit. membrane 70 homolog A      | NS | NS   | NS   | NS   |
| AF466151 | tRNS nucleotidyl transferase, CCA-adding, 1          | NS | NS   | NS   | NS   |
| BJ085185 | tryptophanyl tRNS synthetase 2 (mitochondrial)       | NS | NS   | 1.30 | NS   |
| CD301429 | tyrosine aminotransferase                            | NS | 6.38 | 2.59 | NS   |
| AW767623 | ubiquinol-cytochrome c reductase (6.4kD) subunit     | NS | NS   | 8.05 | 0.51 |
| CB198532 | ubiquinol-cytochrome c reductase binding protein     | NS | NS   | 5.62 | 0.35 |
| CB201180 | ubiquinol-cytochrome c reductase complex (7.2 kD)    | NS | NS   | NS   | NS   |
| BC049288 | ubiquinol-cytochrome c reductase core protein I      | NS | NS   | 4.75 | 0.35 |
| BC042931 | ubiquinol-cytochrome c reductase core protein II     | NS | NS   | 5.09 | 0.32 |
| BG019287 | ubiquinol-cytochrome c reductase hinge protein       | NS | NS   | 3.53 | 0.51 |
| BU901419 | ubiquinol-cytochrome c reductase                     | NS | NS   | NS   | NS   |
| BC045131 | N-acetylgalactosaminyltransferase (GalNSc-T)         | NS | 4.55 | 2.23 | 1.49 |
| BC044682 | uncoupling protein 2 (mitochondrial, proton carrier) | NS | NS   | 0.50 | 2.53 |
| CA980825 | uracil-DNS glycosylase                               | NS | NS   | NS   | NS   |
| BC046577 | voltage-dependent anion channel 1                    | NS | NS   | 4.70 | 0.17 |
| S74063   | v-raf-1 murine leukemia viral oncogene homolog 1     | NS | NS   | 1.56 | 0.7  |

Summary of 400 mitochondrial genes
